# Supplementary material for: Heritability of glaucoma and glaucoma-related endophenotypes: systematic review and meta-analysis protocol
Source: PubMed Central journal article supplement — BMJ Open. 2018 Feb 28;8(2):e019049. doi: 10.1136/bmjopen-2017-019049 (PMC5855254; doi:10.1136/bmjopen-2017-019049), 2018-02-28
Supplement: bmjopen-2017-019049supp002.pdf [file bmjopen-2017-019049supp002.pdf]

**Heritability of glaucoma and glaucoma-related endophenotypes: Systematic review and meta-analysis protocol, 2017**

**Data extraction form**

|                                          |                               |                        |                        |                      |                      |                      |
|------------------------------------------|-------------------------------|------------------------|------------------------|----------------------|----------------------|----------------------|
| Article ID                               | Publication Year              | Volume                 | Issue                  |                      |                      |                      |
| <input type="text"/>                     | <input type="text"/>          | <input type="text"/>   | <input type="text"/>   |                      |                      |                      |
| Authors                                  |                               |                        |                        |                      |                      |                      |
| <input type="text"/>                     |                               |                        |                        |                      |                      |                      |
| Title                                    |                               |                        |                        |                      |                      |                      |
| <input type="text"/>                     |                               |                        |                        |                      |                      |                      |
| Abstract                                 |                               |                        |                        |                      |                      |                      |
| <input type="text"/>                     |                               |                        |                        |                      |                      |                      |
| Country of Study                         | Ethnicity                     | Study Design           | Data Analysis Method   | Sample Size          | Mean Age             | Gender               |
| <input type="text"/>                     | <input type="text"/>          | <input type="text"/>   | <input type="text"/>   | <input type="text"/> | <input type="text"/> | <input type="text"/> |
| Glaucoma Type                            | Endophenotype 1               | Endophenotype 2        | Endophenotype 3        |                      |                      |                      |
| <input type="text"/>                     | <input type="text"/>          | <input type="text"/>   | <input type="text"/>   |                      |                      |                      |
| Glaucoma Type-Heritability ( $h^2$ )     | Heritability ( $h^2$ )        | Heritability ( $h^2$ ) | Heritability ( $h^2$ ) |                      |                      |                      |
| <input type="text"/>                     | <input type="text"/>          | <input type="text"/>   | <input type="text"/>   |                      |                      |                      |
| The Proportion of Variance Accounted by: | Additive Genetic variance (A) | Common Environment (C) | Unique Environment (E) |                      |                      |                      |
|                                          | <input type="text"/>          | <input type="text"/>   | <input type="text"/>   |                      |                      |                      |
| Additional Comments                      |                               |                        |                        |                      |                      |                      |
| <input type="text"/>                     |                               |                        |                        |                      |                      |                      |
