# Supplementary material for: Heritability of glaucoma and glaucoma-related endophenotypes: systematic review and meta-analysis protocol
Source: PubMed Central journal article supplement — BMJ Open. 2018 Feb 28;8(2):e019049. doi: 10.1136/bmjopen-2017-019049 (PMC5855254; doi:10.1136/bmjopen-2017-019049), 2018-02-28

# Heritability of glaucoma and glaucoma-related endophenotypes: Systematic review and meta-analysis protocol, 2017

## Preferred Reporting Items for Systematic Reviews and Meta-Analyses (PRISMA) flow chart

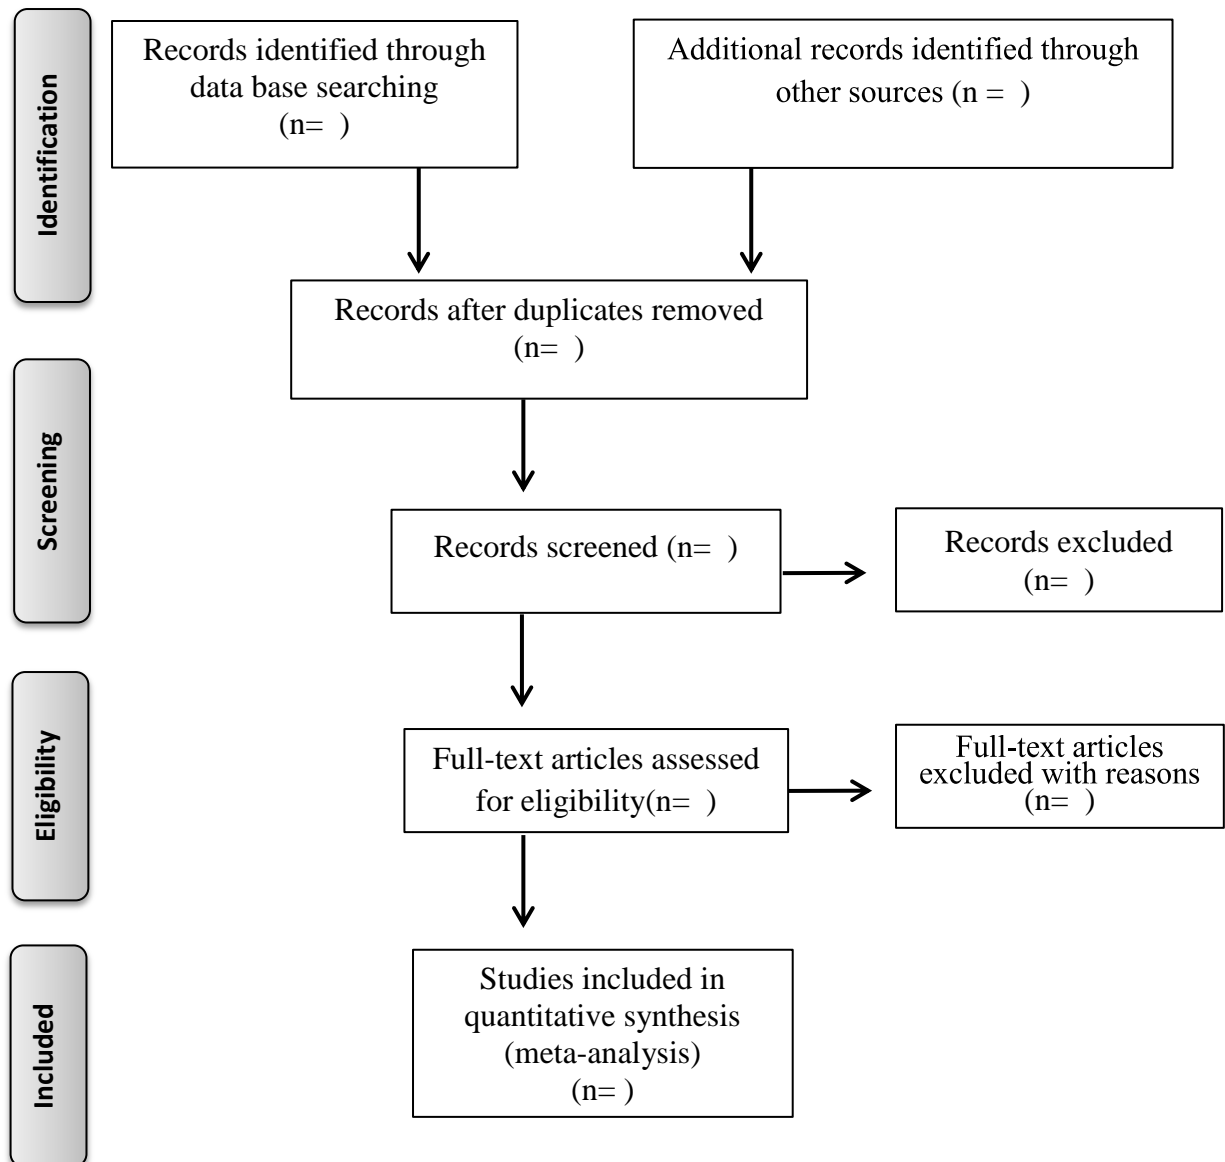

Supplement: bmjopen-2017-019049supp003.pdf [file bmjopen-2017-019049supp003.pdf]
